# Supplementary material for: Effects of Fermented Bamboo Shoot Processing Waste on Growth Performance, Serum Parameters, and Gut Microbiota of Weaned Piglets
Source: MDPI journal article supplement (doi:10.3390/ani12202728), 2022-10-11

Table S1. Serum biochemical indices of weaned piglets fed different feeds containing different fermented bamboo shoot processing wastes (FBSPW). Control, A, B, and C were the piglets fed basal diet, basal diet with 4% FBSPW, basal diet with 8% FBSPW, and basal diet with 12% FBSPW, respectively.

| Items | A                        | B                       | C                        | CK                      |
|-------|--------------------------|-------------------------|--------------------------|-------------------------|
| GLU   | 7.46±1.75                | 7.6±1.41                | 7.04±0.95                | 7.71±0.83               |
| T-cho | 2.23±0.40                | 1.84±0.14               | 2.26±0.30                | 2.29±0.21               |
| TG    | 0.34±0.02 <sup>b</sup>   | 0.36±0.02 <sup>b</sup>  | 0.39±0.08 <sup>b</sup>   | 0.58±0.07 <sup>a</sup>  |
| LDL-C | 0.55±0.14                | 0.58±0.06               | 0.58±0.10                | 0.61±0.19               |
| TP    | 43.02±1.71               | 52.57±10.27             | 45.65±6.66               | 47.82±0.24              |
| ALB   | 27.60±3.16 <sup>ab</sup> | 30.31±4.67 <sup>a</sup> | 27.18±2.29 <sup>ab</sup> | 21.24±3.32 <sup>b</sup> |
| HDL-C | 2.01±0.17 <sup>ab</sup>  | 2.16±0.18 <sup>a</sup>  | 1.9±0.32 <sup>ab</sup>   | 1.59±0.16 <sup>b</sup>  |
| BUN   | 1.74±0.46 <sup>ab</sup>  | 1.35±0.17 <sup>b</sup>  | 1.24±0.06 <sup>b</sup>   | 2.81±0.69 <sup>a</sup>  |

Figure S1. Alpha diversity indices of colon and cecum microbiota of weaned piglets fed different feeds containing different fermented bamboo shoot processing wastes (FBSPW). (A), feature number; (B) Shannon index; (C) Simpson index; (D) ACE index; (E) PD index; and (F) Goods' coverage. Control, A, B, and C were the piglets fed basal diet, basal diet with 4% FBSPW, basal diet with 8% FBSPW, and basal diet with 12% FBSPW, respectively.

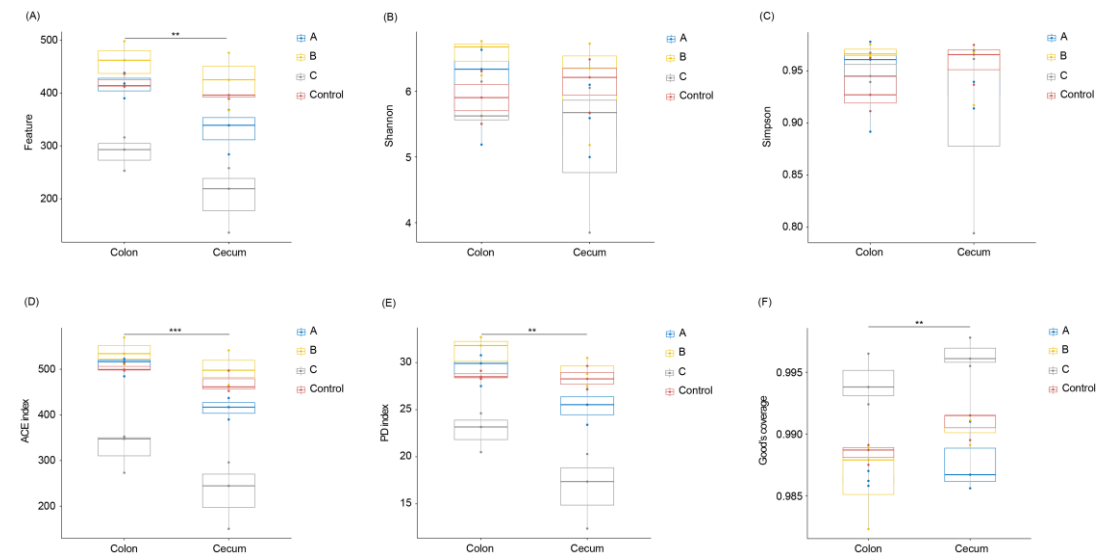

Figure S2. Relative abundance changes of gut microorganisms of weaned piglets fed different feeds containing different fermented bamboo shoot processing wastes (FBSPW). Control, A, B, and C were the piglets fed basal diet, basal diet with 4% FBSPW, basal diet with 8% FBSPW, and basal diet with 12% FBSPW, respectively.

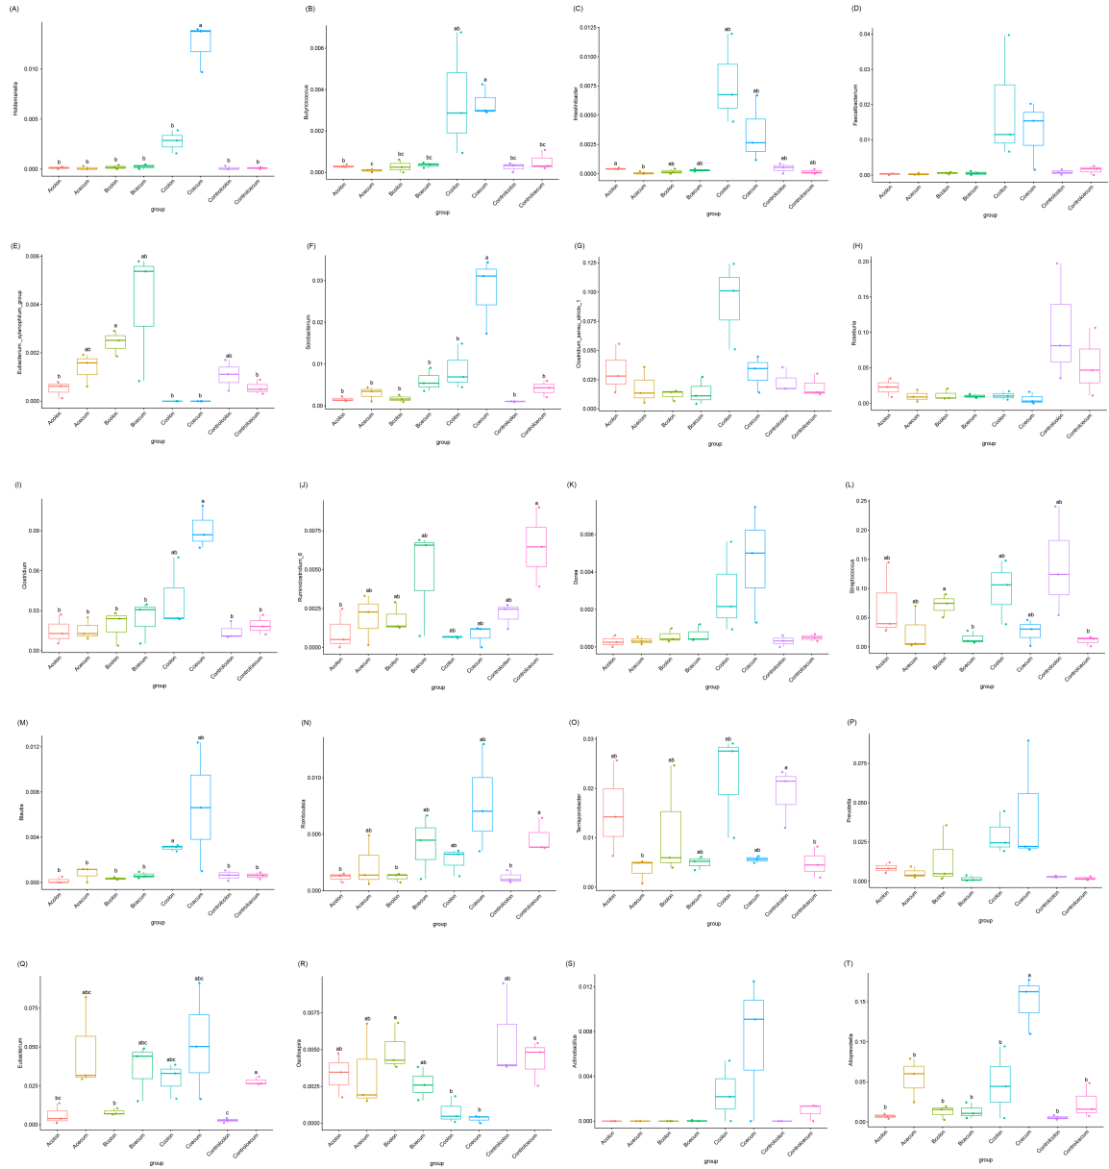

Supplement: s1 [file s1]
